# Supplementary material
Source: PubMed Central journal article supplement (PMC4815638)
Supplement: hdy201424x5.pdf [file hdy201424x5.pdf]

**Supplementary Table 1** List of the 406 SNPs observed in the modern dataset and annotated according to dbSNP Build 137

| <b>Chromosome</b> | <b>Genomic position</b> | <b>SNP_ID</b> |
|-------------------|-------------------------|---------------|
| 1                 | 3102700                 | rs183153140   |
| 1                 | 3102751                 | rs187194973   |
| 1                 | 3102888                 | rs143467979   |
| 1                 | 3160692                 | rs150097149   |
| 1                 | 3301721                 | rs2282198     |
| 1                 | 3313108                 | rs12058363    |
| 1                 | 3319384                 | rs185041492   |
| 1                 | 3319461                 | rs61756439    |
| 1                 | 3319522                 | rs187351394   |
| 1                 | 3319541                 | rs141374404   |
| 1                 | 3321352                 | rs191798831   |
| 1                 | 3322073                 | rs182903782   |
| 1                 | 3322097                 | rs2483221     |
| 1                 | 3322139                 | rs61745281    |
| 1                 | 3327973                 | rs139129844   |
| 1                 | 3328187                 | rs188908415   |
| 1                 | 3328358                 | rs870124      |
| 1                 | 3328445                 | rs150395260   |
| 1                 | 3328470                 | rs138655327   |
| 1                 | 3328659                 | rs2493292     |
| 1                 | 3328852                 | rs35184988    |
| 1                 | 3328891                 | rs193118666   |
| 1                 | 3329051                 | rs149333409   |
| 1                 | 3329111                 | rs183595422   |
| 1                 | 3329263                 | rs115226069   |
| 1                 | 3329267                 | rs114204766   |
| 1                 | 3331138                 | rs184929979   |
| 1                 | 3331193                 | rs3819970     |
| 1                 | 3334493                 | rs59135929    |
| 1                 | 3334514                 | rs140540302   |
| 1                 | 3334515                 | rs150022595   |
| 1                 | 3342197                 | rs144180800   |
| 1                 | 3342635                 | rs187400273   |
| 1                 | 3342649                 | rs193241720   |
| 1                 | 3342659                 | rs113879347   |
| 1                 | 3348695                 | rs188634763   |
| 1                 | 3350341                 | rs182452331   |
| 1                 | 65890990                | rs13306523    |
| 1                 | 65890994                | rs192341979   |
| 1                 | 66031284                | rs147768538   |
| 1                 | 66036441                | rs1137100     |
| 1                 | 66058349                | rs190058080   |
| 1                 | 66058513                | rs1137101     |
| 1                 | 66067109                | rs1805134     |
| 1                 | 66067141                | rs183083824   |
| 1                 | 66067188                | rs142252410   |

|   |           |             |
|---|-----------|-------------|
| 1 | 66067289  | rs186348396 |
| 1 | 66067295  | rs151223248 |
| 1 | 66067608  | rs190804135 |
| 1 | 66075690  | rs183714647 |
| 1 | 66075712  | rs144159890 |
| 1 | 66075776  | rs191139470 |
| 1 | 66075782  | rs184729504 |
| 1 | 66075952  | rs8179183   |
| 1 | 66081741  | rs192825082 |
| 1 | 66081791  | rs34499590  |
| 1 | 66081828  | rs184183751 |
| 1 | 66095962  | rs142740539 |
| 1 | 66102128  | rs138826362 |
| 1 | 66102158  | rs1805095   |
| 1 | 66102224  | rs6413506   |
| 1 | 66102257  | rs1805096   |
| 1 | 66102679  | rs145685060 |
| 1 | 84700907  | rs190425316 |
| 3 | 12393125  | rs1801282   |
| 3 | 12421253  | rs143370807 |
| 3 | 12421406  | rs181976291 |
| 3 | 12458209  | rs147996578 |
| 3 | 12458274  | rs13306747  |
| 3 | 12458367  | rs191342668 |
| 3 | 12458386  | rs139894525 |
| 3 | 12458494  | rs141683496 |
| 3 | 12475440  | rs28763894  |
| 3 | 12475490  | rs186728157 |
| 3 | 12475497  | rs41516544  |
| 3 | 12475557  | rs3856806   |
| 3 | 48789117  | rs140573777 |
| 3 | 48789132  | rs150452598 |
| 3 | 48789660  | rs117433616 |
| 3 | 48802465  | rs144069299 |
| 3 | 48820465  | rs182210450 |
| 3 | 48884841  | rs139959307 |
| 3 | 48884873  | rs181690449 |
| 4 | 141483471 | rs2270565   |
| 4 | 141484292 | rs138611550 |
| 4 | 141484351 | rs188223067 |
| 4 | 141484533 | rs192333501 |
| 4 | 141484554 | rs184542519 |
| 4 | 141488991 | rs185921413 |
| 4 | 141489068 | rs45539933  |
| 4 | 141489766 | rs150067245 |
| 4 | 23797481  | rs142128780 |
| 4 | 23803430  | rs145169644 |
| 4 | 23814707  | rs3736265   |
| 4 | 23814710  | rs144103777 |
| 4 | 23815410  | rs58772979  |

|   |           |             |
|---|-----------|-------------|
| 4 | 23815522  | rs3755863   |
| 4 | 23815661  | rs145793977 |
| 4 | 23815662  | rs8192678   |
| 4 | 23815677  | rs183750359 |
| 4 | 23815678  | rs61743310  |
| 4 | 23815681  | rs17574213  |
| 4 | 23815793  | rs35437002  |
| 4 | 23815878  | rs34514918  |
| 4 | 23815912  | rs188074693 |
| 4 | 23815924  | rs2970847   |
| 4 | 23816139  | rs180756790 |
| 4 | 23833219  | rs35891516  |
| 4 | 23833267  | rs115950363 |
| 4 | 23886322  | rs60876252  |
| 4 | 23886323  | rs2946385   |
| 4 | 23886492  | rs181049080 |
| 5 | 149200008 | rs45518035  |
| 5 | 149200043 | rs32588     |
| 5 | 149206391 | rs147532359 |
| 5 | 149210396 | rs189353551 |
| 5 | 149212224 | rs149956939 |
| 5 | 149212243 | rs7732671   |
| 5 | 149212301 | rs75266799  |
| 5 | 149212305 | rs115086457 |
| 5 | 149212430 | rs45520937  |
| 5 | 149212470 | rs137977348 |
| 5 | 149212471 | rs17572019  |
| 5 | 149212510 | rs11959820  |
| 5 | 149212590 | rs144195384 |
| 5 | 149212614 | rs115557257 |
| 5 | 149212624 | rs45470697  |
| 5 | 149212687 | rs77687445  |
| 5 | 149212724 | rs45526537  |
| 5 | 149212800 | rs32577     |
| 5 | 149212802 | rs45519432  |
| 5 | 149212853 | rs147798578 |
| 5 | 149212897 | rs141717472 |
| 5 | 149213019 | rs141187835 |
| 5 | 149213135 | rs45549037  |
| 5 | 149213217 | rs12659862  |
| 5 | 149213218 | rs114581116 |
| 5 | 149214906 | rs45458196  |
| 5 | 149216142 | rs45617032  |
| 5 | 149216159 | rs45509002  |
| 5 | 149216199 | rs186462923 |
| 5 | 149216256 | rs45588534  |
| 5 | 149216304 | rs45543631  |
| 5 | 149219653 | rs150637009 |
| 5 | 149219663 | rs138772212 |
| 5 | 149219665 | rs182592244 |

|   |           |             |
|---|-----------|-------------|
| 5 | 149221842 | rs114273610 |
| 5 | 149221858 | rs144054131 |
| 5 | 149221917 | rs45572344  |
| 5 | 149225335 | rs143268818 |
| 5 | 149225336 | rs193283098 |
| 5 | 149225434 | rs146674370 |
| 5 | 149226893 | rs146271786 |
| 5 | 149226924 | rs113652806 |
| 5 | 149226949 | rs45512103  |
| 5 | 149226992 | rs76206609  |
| 7 | 106685427 | rs75727925  |
| 7 | 106685448 | rs75385144  |
| 7 | 106685640 | rs115878034 |
| 7 | 106791447 | rs3729878   |
| 7 | 106793666 | rs77265974  |
| 7 | 106799958 | rs76484258  |
| 7 | 106799997 | rs257376    |
| 7 | 127892124 | rs148407750 |
| 7 | 127892146 | rs13306517  |
| 7 | 127894592 | rs17151919  |
| 7 | 127894621 | rs28954113  |
| 7 | 127894796 | rs191666811 |
| 7 | 129297323 | rs143882672 |
| 7 | 129297332 | rs1882094   |
| 7 | 129297368 | rs141371391 |
| 7 | 129311285 | rs146404476 |
| 7 | 129330353 | rs3735006   |
| 7 | 129348929 | rs140130691 |
| 7 | 129348932 | rs150058523 |
| 7 | 129357112 | rs190838970 |
| 8 | 26627672  | rs2229126   |
| 8 | 26627895  | rs151273238 |
| 8 | 26627940  | rs140512348 |
| 8 | 26628028  | rs1048101   |
| 8 | 26628060  | rs147084464 |
| 8 | 26636882  | rs61760538  |
| 8 | 26636898  | rs182482503 |
| 8 | 26636906  | rs60593443  |
| 8 | 26636918  | rs61760540  |
| 8 | 26636925  | rs6989854   |
| 8 | 26716642  | rs61757000  |
| 8 | 26716699  | rs61757002  |
| 8 | 26716700  | rs149312010 |
| 8 | 26716715  | rs538378    |
| 8 | 26721668  | rs61757007  |
| 8 | 26721748  | rs3730287   |
| 8 | 26721764  | rs7833704   |
| 8 | 26721888  | rs2229125   |
| 8 | 26721990  | rs56233953  |
| 8 | 26722025  | rs2229124   |

|    |           |             |
|----|-----------|-------------|
| 8  | 26722027  | rs61757009  |
| 8  | 26722345  | rs186663065 |
| 8  | 37822860  | rs4996      |
| 8  | 37822865  | rs143480096 |
| 8  | 37822931  | rs36031925  |
| 8  | 37822959  | rs189523193 |
| 8  | 37823185  | rs13306151  |
| 8  | 37823476  | rs150886462 |
| 8  | 37823527  | rs184077488 |
| 8  | 37823607  | rs45563241  |
| 8  | 37823798  | rs4994      |
| 9  | 19116258  | rs10453193  |
| 9  | 19116543  | rs2229536   |
| 9  | 19116589  | rs72561715  |
| 9  | 19116597  | rs151306072 |
| 9  | 19116617  | rs183420763 |
| 9  | 19116630  | rs141685840 |
| 9  | 19119674  | rs35568725  |
| 9  | 19119758  | rs114836303 |
| 9  | 19120980  | rs78408401  |
| 9  | 19121036  | rs184912985 |
| 9  | 19121142  | rs143794161 |
| 9  | 19123468  | rs192568448 |
| 9  | 19123473  | rs77739561  |
| 9  | 19126124  | rs149124591 |
| 9  | 19126281  | rs2228416   |
| 9  | 19126307  | rs142216441 |
| 10 | 103892888 | rs34756593  |
| 10 | 103897657 | rs144038954 |
| 10 | 103897700 | rs34820347  |
| 10 | 103897747 | rs183906213 |
| 10 | 103898889 | rs17847383  |
| 10 | 103899047 | rs143974270 |
| 10 | 103899124 | rs146882245 |
| 10 | 103899659 | rs61756436  |
| 10 | 103899851 | rs184346801 |
| 10 | 103899871 | rs17114388  |
| 10 | 103899915 | rs187129542 |
| 10 | 103899939 | rs192837865 |
| 10 | 103900089 | rs184366358 |
| 10 | 103900143 | rs111282144 |
| 10 | 103900354 | rs182184460 |
| 10 | 103900608 | rs145377546 |
| 10 | 103900729 | rs61731871  |
| 10 | 103900766 | rs17855877  |
| 10 | 103900887 | rs184648881 |
| 10 | 103900991 | rs143292683 |
| 10 | 103901127 | rs79834526  |
| 10 | 103901359 | rs147896666 |
| 10 | 103901371 | rs141564083 |

|    |           |             |
|----|-----------|-------------|
| 10 | 103901463 | rs147391687 |
| 10 | 103901629 | rs181513453 |
| 10 | 103901709 | rs76353662  |
| 10 | 103901723 | rs185700596 |
| 10 | 103906431 | rs117619833 |
| 10 | 103906479 | rs80014803  |
| 10 | 103906482 | rs145446235 |
| 10 | 103906612 | rs118161359 |
| 10 | 103906768 | rs147678394 |
| 10 | 103906800 | rs149127234 |
| 10 | 103906807 | rs17847388  |
| 10 | 103907055 | rs34169738  |
| 10 | 103907104 | rs148265392 |
| 10 | 103908183 | rs182209839 |
| 10 | 103908200 | rs186559053 |
| 10 | 103908217 | rs145965846 |
| 10 | 103908648 | rs117783488 |
| 10 | 103908944 | rs61756437  |
| 10 | 103908974 | rs144399657 |
| 10 | 103908983 | rs113506045 |
| 11 | 73686548  | rs45490393  |
| 11 | 73686601  | rs45526034  |
| 11 | 73686622  | rs139945658 |
| 11 | 73687738  | rs45600039  |
| 11 | 73689041  | rs45541732  |
| 11 | 73689056  | rs182694614 |
| 11 | 73689099  | rs145662569 |
| 11 | 73689104  | rs660339    |
| 11 | 73689112  | rs45524433  |
| 11 | 73689309  | rs148253207 |
| 14 | 80669386  | rs140743723 |
| 14 | 80669580  | rs225014    |
| 14 | 80669587  | rs143144220 |
| 14 | 80672669  | rs181652125 |
| 15 | 90209135  | rs8179074   |
| 15 | 90210167  | rs2304797   |
| 15 | 90210172  | rs189637126 |
| 15 | 90210197  | rs150128694 |
| 15 | 90210219  | rs8179072   |
| 15 | 90210237  | rs146385147 |
| 15 | 90210257  | rs2304796   |
| 15 | 90210263  | rs2304795   |
| 15 | 90210894  | rs74407840  |
| 15 | 90210919  | rs3743373   |
| 15 | 90210957  | rs149989895 |
| 15 | 90210984  | rs58361219  |
| 15 | 90212810  | rs114583540 |
| 15 | 90212836  | rs8179042   |
| 15 | 90213229  | rs6496589   |
| 15 | 90213278  | rs148013068 |

|    |          |             |
|----|----------|-------------|
| 15 | 90213343 | rs111663599 |
| 15 | 90213395 | rs143954379 |
| 15 | 90216643 | rs76895441  |
| 16 | 53922838 | rs16952624  |
| 16 | 53945312 | rs138587318 |
| 16 | 53945317 | rs144100465 |
| 16 | 53945320 | rs75097003  |
| 16 | 53945351 | rs2287142   |
| 16 | 53945359 | rs80130403  |
| 16 | 53967952 | rs141327394 |
| 17 | 66511627 | rs3730349   |
| 17 | 66511639 | rs184088832 |
| 17 | 66518923 | rs74863634  |
| 17 | 66521096 | rs117639566 |
| 17 | 66526473 | rs1803241   |
| 19 | 42905994 | rs188554466 |
| 19 | 42906024 | rs36104839  |
| 19 | 42906155 | rs193061079 |
| 19 | 42906838 | rs137885656 |
| 19 | 42906846 | rs140658352 |
| 19 | 42906914 | rs7246232   |
| 19 | 42907064 | rs70937099  |
| 19 | 42907080 | rs70937098  |
| 19 | 42907179 | rs188642115 |
| 19 | 42909626 | rs191855430 |
| 19 | 42910416 | rs28657829  |
| 19 | 42910454 | rs45603141  |
| 19 | 42910455 | rs141921519 |
| 19 | 42910497 | rs192667531 |
| 19 | 42910525 | rs150484479 |
| 19 | 42911558 | rs2229614   |
| 19 | 42911617 | rs144357047 |
| 19 | 42911769 | rs34052647  |
| 19 | 42911770 | rs138942820 |
| 19 | 42911829 | rs181772536 |
| 19 | 42911877 | rs142087188 |
| 19 | 42912129 | rs146329410 |
| 19 | 42912131 | rs139523276 |
| 19 | 42912158 | rs113931918 |
| 19 | 42912397 | rs150594707 |
| 19 | 42912399 | rs33921216  |
| 19 | 42912403 | rs35938529  |
| 19 | 42914609 | rs34044249  |
| 19 | 42914668 | rs138983180 |
| 19 | 42914765 | rs34623222  |
| 19 | 42914860 | rs183211333 |
| 19 | 42914888 | rs142099480 |
| 19 | 42914948 | rs146332894 |
| 19 | 42930432 | rs70937097  |
| 19 | 42930586 | rs151313125 |

|    |          |             |
|----|----------|-------------|
| 19 | 42930652 | rs3745238   |
| 19 | 42930721 | rs34996020  |
| 19 | 42930734 | rs141744211 |
| 19 | 42930773 | rs16975748  |
| 19 | 42930792 | rs143194692 |
| 19 | 42930866 | rs34348028  |
| 19 | 42931004 | rs16975750  |
| 19 | 42931007 | rs116152392 |
| 19 | 42931022 | rs145456377 |
| 19 | 42931095 | rs147680554 |
| 19 | 42931135 | rs144611416 |
| 19 | 42931185 | rs41275756  |
| 19 | 42930751 | rs149927060 |
| 19 | 4523709  | rs141998895 |
| 19 | 4523753  | rs115044192 |
| 19 | 4523855  | rs150673723 |
| 19 | 4523861  | rs117277377 |
| 19 | 4523873  | rs75942973  |
| 19 | 4523884  | rs75748078  |
| 19 | 4523889  | rs_4523889  |
| 19 | 4523904  | rs115387113 |
| 19 | 4523918  | rs189668026 |
| 19 | 4523947  | rs182486411 |
| 19 | 4524002  | rs186412345 |
| 19 | 4524005  | rs146320009 |
| 19 | 4524016  | rs1062223   |
| 19 | 4525046  | rs1610090   |
| 19 | 4525761  | rs116972497 |
| 19 | 4529086  | rs180880894 |
| 19 | 4529152  | rs78954683  |
| 19 | 4529167  | rs145164043 |
| 19 | 4529245  | rs187338873 |
| 19 | 4529833  | rs185753001 |
| 19 | 4531658  | rs138772557 |
| 19 | 4839274  | rs139813355 |
| 19 | 4839514  | rs34402881  |
| 19 | 4844704  | rs187530537 |
| 19 | 4844785  | rs34558416  |
| 19 | 4844790  | rs34070230  |
| 19 | 4847713  | rs9973235   |
| 19 | 4847743  | rs186843839 |
| 19 | 4847757  | rs76682008  |
| 19 | 4847824  | rs184331628 |
| 19 | 4847828  | rs76170548  |
| 19 | 4847861  | rs189557614 |
| 19 | 4847868  | rs10406652  |
| 19 | 4847874  | rs9304915   |
| 19 | 4852074  | rs149440810 |
| 19 | 4852106  | rs2271058   |
| 19 | 4852137  | rs1055919   |



|    |         |             |
|----|---------|-------------|
| 19 | 4852196 | rs144836425 |
| 19 | 4852206 | rs117017052 |
| 19 | 4852284 | rs189305529 |
| 19 | 4859631 | rs11552104  |
| 19 | 4859644 | rs11552102  |
| 19 | 4859937 | rs8289      |
| 19 | 4861350 | rs150099674 |
| 19 | 4861355 | rs192291818 |
| 19 | 4861371 | rs138618022 |
| 19 | 4861395 | rs145415169 |
